# Supplementary material
Source: PubMed Central journal article supplement (PMC7711742)
Supplement: IBMK_A_1829056_SM1213.pdf [file IBMK_A_1829056_SM1213.pdf]

**Supplemental Figure: Flow Diagram**

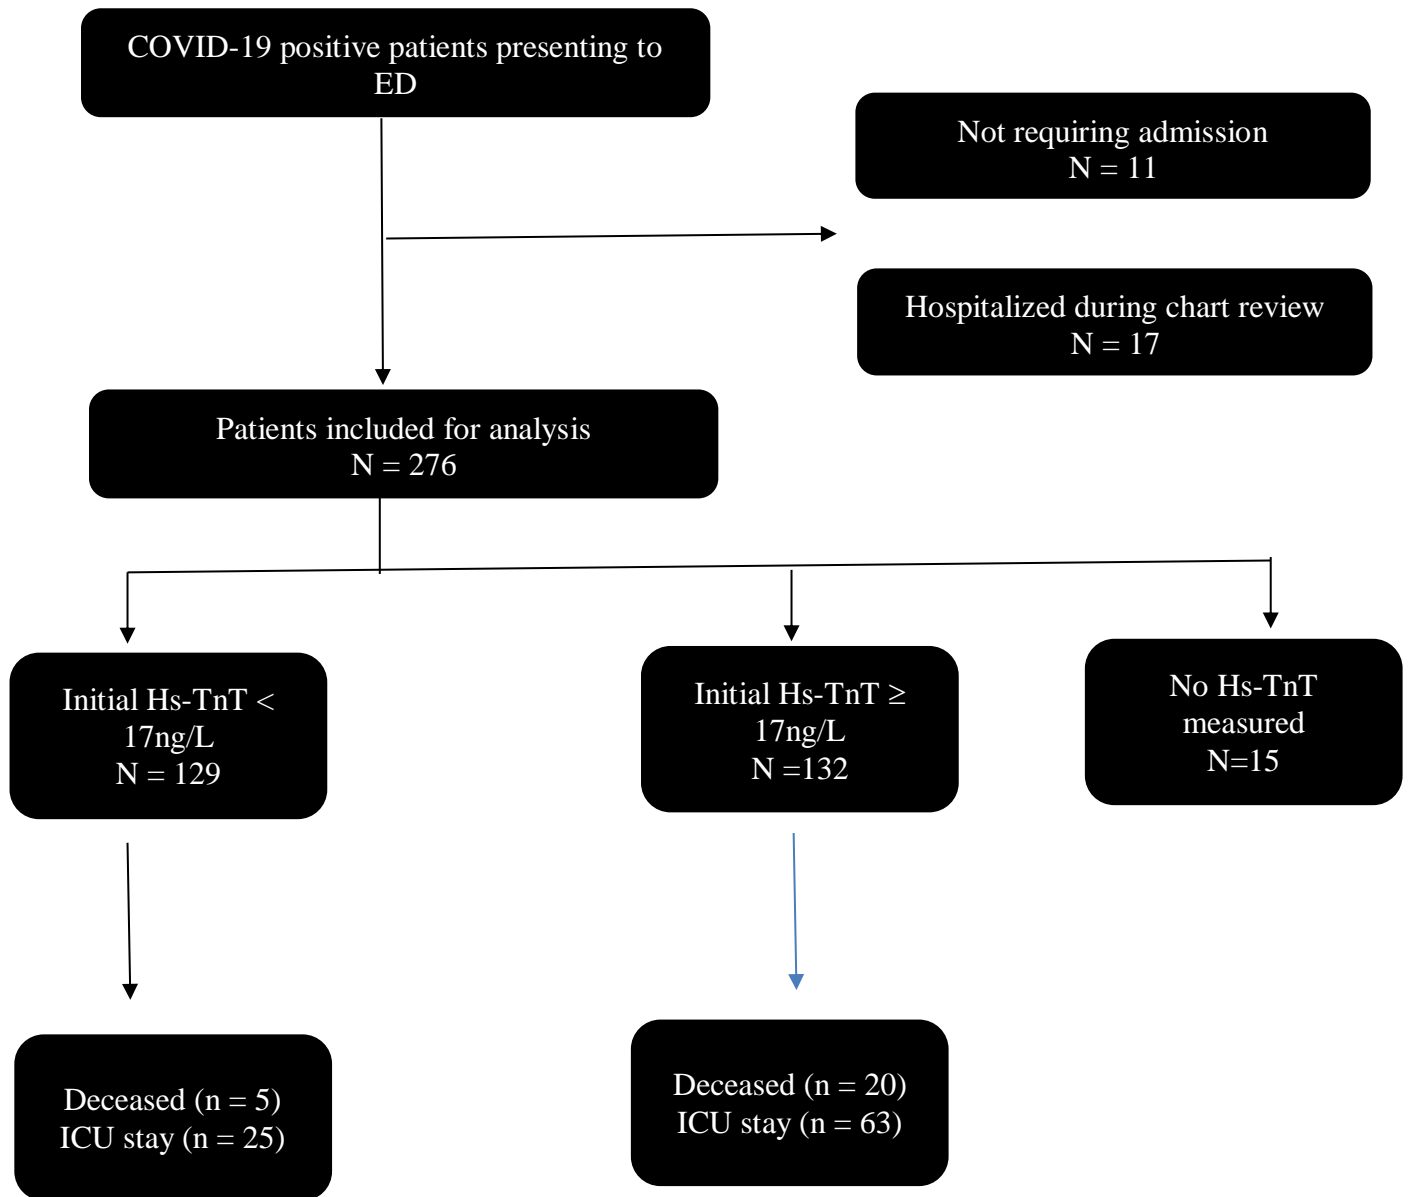

**Supplemental Table 1: In-Hospital Clinical Outcomes of Study Population Stratified by Sex-Specific Median Initial hs-TnT Value**

**1a. Male**

| <b>Variable</b>                               | <b>Overall Population<br/>(n = 130)</b> | <b>hs-Trop ≥ 21<br/>ng/L<br/>(n = 63)</b> | <b>hs-Trop &lt; 21<br/>ng/L<br/>(n = 61)</b> | <b>p-value</b> |
|-----------------------------------------------|-----------------------------------------|-------------------------------------------|----------------------------------------------|----------------|
| <b>Length of Stay (days)</b>                  | 7 (4-12)                                | 9 (6-15)                                  | 4 (3-8)                                      | <0.01          |
| <b>Discharged Home</b>                        | 89 (68.5)                               | 29 (46.0)                                 | 55 (90.2)                                    | <0.01          |
| <b>Discharged to Facility</b>                 | 25 (19.2)                               | 21 (33.3)                                 | 3 (4.9)                                      | <0.01          |
| <b>Deceased Inpatient</b>                     | 16 (12.3)                               | 13 (20.6)                                 | 3 (4.9)                                      | <0.01          |
| <b>Intubation</b>                             | 22 (16.9)                               | 17 (27.0)                                 | 4 (6.6)                                      | <0.01          |
| <b>Shock Requiring Vasoactive Medications</b> | 17 (13.1)                               | 13 (20.6)                                 | 3 (4.9)                                      | 0.01           |
| <b>ICU Admission</b>                          | 49 (37.7)                               | 36 (57.1)                                 | 10 (16.4)                                    | <0.01          |
| <b>Cardiac Arrest</b>                         | 8 (6.2)                                 | 5 (7.9)                                   | 3 (4.9)                                      | 0.49 (NS)      |

**1b. Female**

| <b>Variable</b>                               | <b>Overall Population<br/>(n = 146)</b> | <b>hs-Trop ≥ 14<br/>ng/L<br/>(n = 69)</b> | <b>hs-Trop &lt; 14<br/>ng/L<br/>(n = 68)</b> | <b>p-value</b> |
|-----------------------------------------------|-----------------------------------------|-------------------------------------------|----------------------------------------------|----------------|
| <b>Length of Stay (days)</b>                  | 6 (3-11)                                | 9 (3-14)                                  | 5 (3-7)                                      | <0.01          |
| <b>Discharged Home</b>                        | 113 (77.4)                              | 41 (59.4)                                 | 65 (95.6)                                    | <0.01          |
| <b>Discharged to Facility</b>                 | 23 (15.8)                               | 20 (29.0)                                 | 2 (2.9)                                      | <0.01          |
| <b>Deceased Inpatient</b>                     | 10 (6.9)                                | 8 (11.6)                                  | 1 (1.5)                                      | 0.03           |
| <b>Intubation</b>                             | 19 (13.0)                               | 14 (20.3)                                 | 4 (5.9)                                      | 0.01           |
| <b>Shock Requiring Vasoactive Medications</b> | 19 (13.0)                               | 15 (21.7)                                 | 3 (4.4)                                      | <0.01          |
| <b>ICU Admission</b>                          | 44 (30.1)                               | 28 (40.6)                                 | 14 (20.6)                                    | 0.01           |
| <b>Cardiac Arrest</b>                         | 1 (0.7)                                 | 1 (1.5)                                   | 0 (0.0)                                      | 1              |
